# Supplementary material for: Photoinduced DNA Cleavage and Photocytotoxic of Phenanthroline-Based Ligand Ruthenium Compounds
Source: MDPI journal article supplement (doi:10.3390/molecules26113471), 2021-06-07
Supplement: s1 [file s1]

## Supplementary material

molecules

### Photoinduced DNA Cleavage and Photocytotoxic of Phenanthroline-Based Ligand Ruthenium Compounds

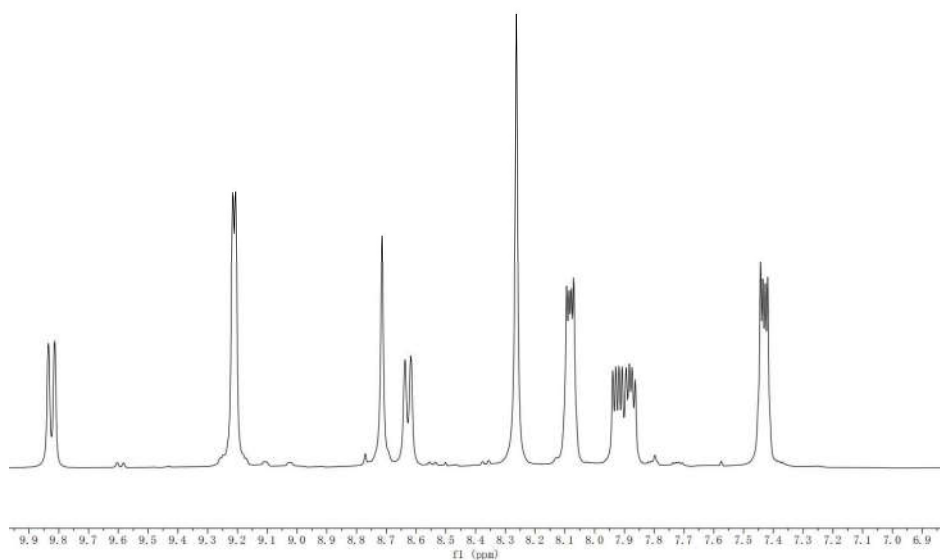

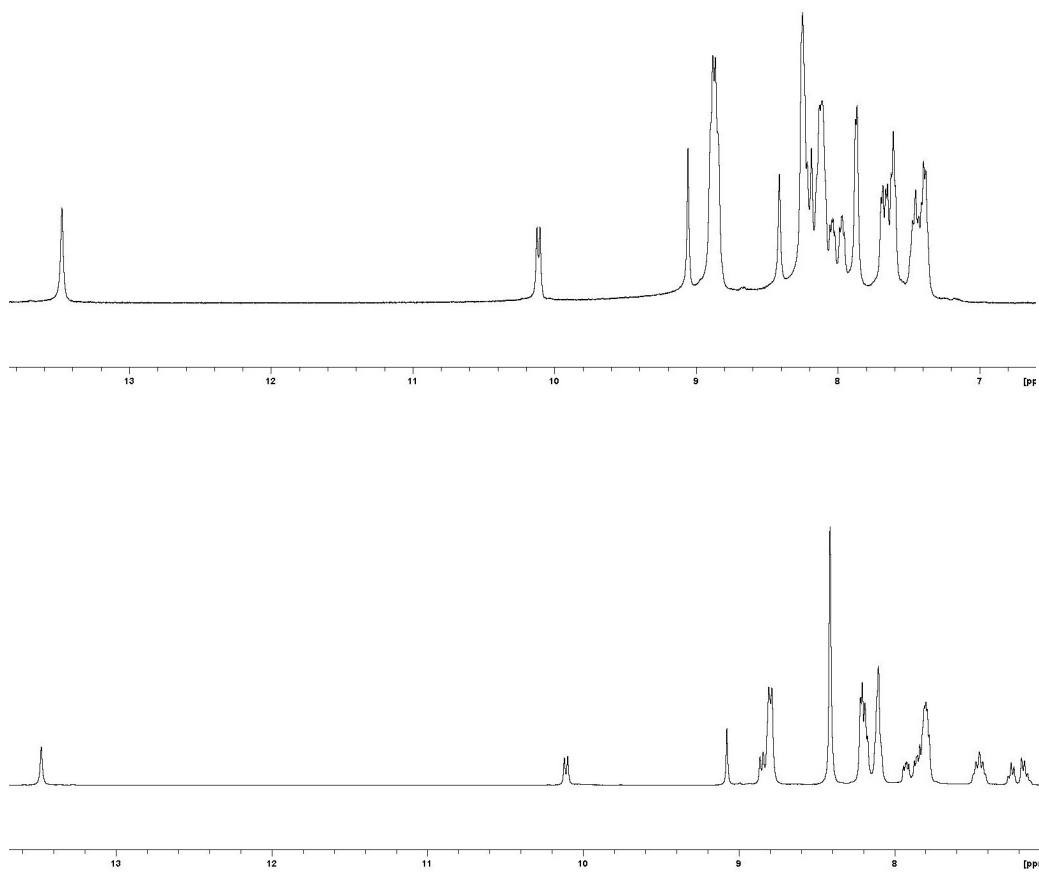

**Figure S1.**  $^1\text{H}$  NMR in aromatic region of the ligand pni(top), complex **1** (middle) and **2** (bottom) in  $(\text{CD}_3)_2\text{SO}$  (400 MHz)

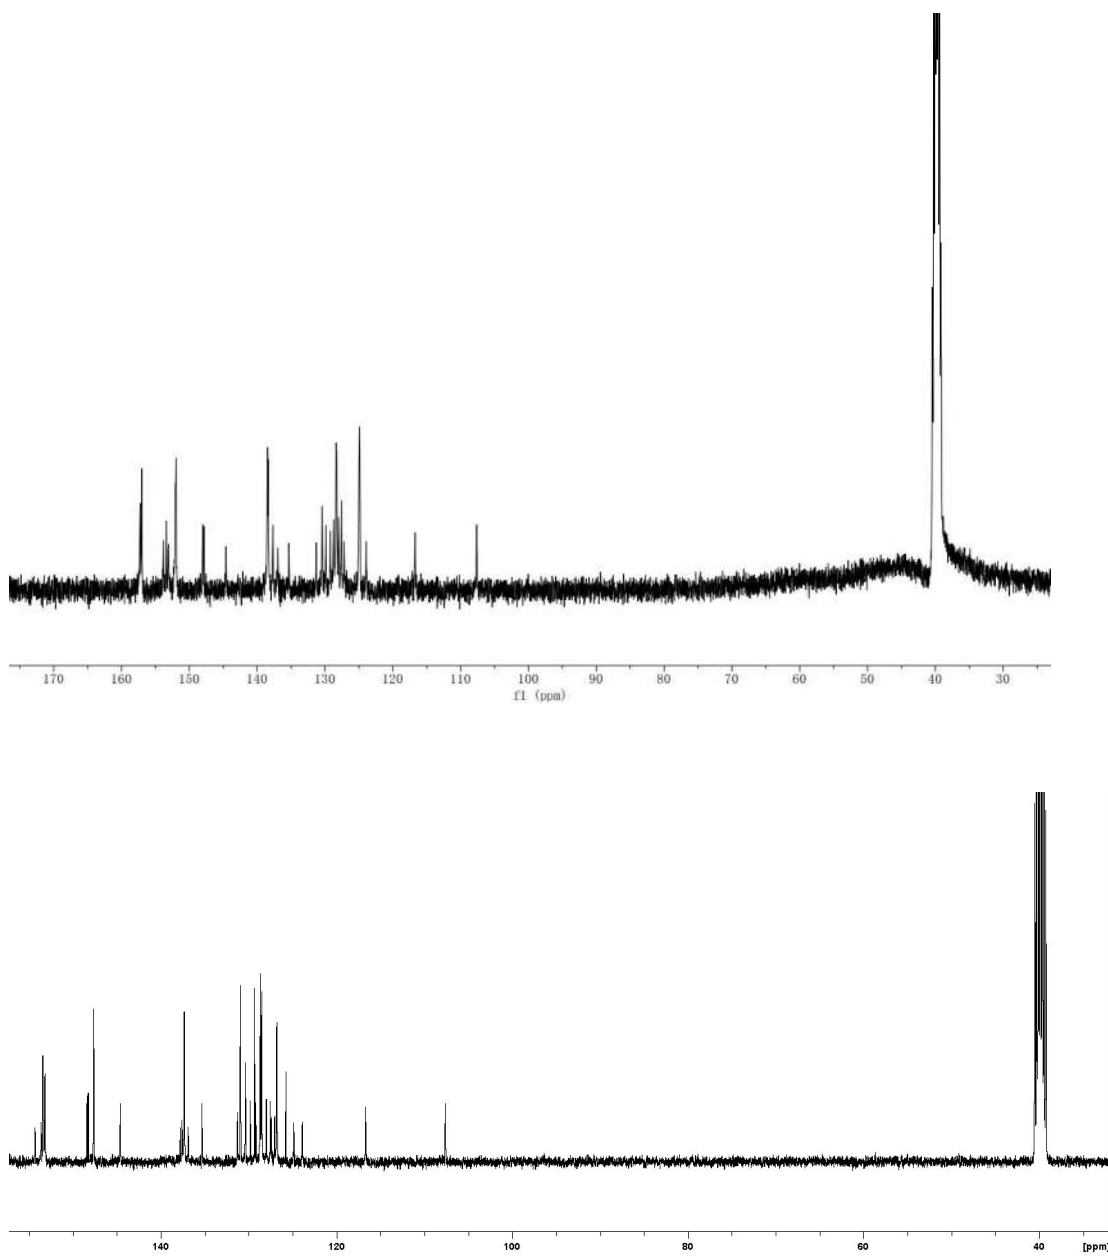

**Figure S2.**  $^{13}\text{C}$  NMR in aromatic region of complex **1** (top) and **2** (bottom) in  $(\text{CD}_3)_2\text{SO}$  (100 MHz)

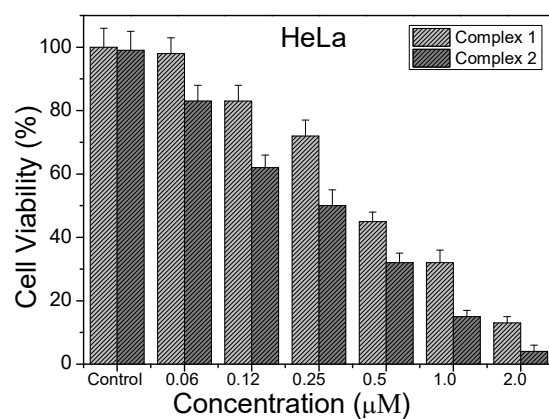

**Figure S3.** Cell viabilities of HeLa cells pretreated with various concentrations complexes **1** and **2** for 12h and irradiated at 450 nm,for 10 min (6 mW/cm<sup>2</sup>).

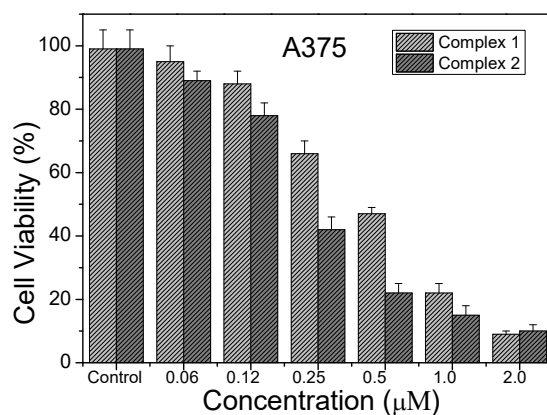

**Figure S4.** Cell viabilities of A375 cells pretreated with various concentrations complexes **1** and **2** for 12h and irradiated at 450 nm,for 10 min (6 mW/cm<sup>2</sup>).

#### *Singlet Oxygen Quantum Yield Measurement*

The <sup>1</sup>O<sub>2</sub> generation quantum yields of Ru(II) complexes were measured by reaction between 1,3-diphenylisobenzofuran (DPBF) with singlet oxygen. The 2 ml air-saturated methanol solutions containing DPBF (20 μM) and complexes (20 μM) were illuminated with light of 450 nm (obtained from Hitachi F-2500 spectrofluorophotometer, 5 nm of excitation slit width). The consumptions of DPBF

were monitored its fluorescence intensity decrease at the emission maximum ( $\lambda_{\text{ex}} = 405 \text{ nm}$ ,  $\lambda_{\text{em}} = 479 \text{ nm}$ ) at different irradiation time.

The  $^1\text{O}_2$  generation quantum yield ( $\Phi_{\Delta}$ ) was calculated according to eq. S1 and S2, where  $I_{\text{in}}$  is the incident monochromatic light intensity,  $\Phi_{\text{ab}}$  is the light absorbing efficiency of the photosensitizer,  $\Phi_r$  is the reaction quantum yield of  $^1\text{O}_2$  with DPBF,  $t$  is the irradiation time,  $I_0$  and  $I_t$  is the fluorescence intensity of DPBF before and after irradiation,  $k$  is the slope, and superscript s stands for standard.

$$\frac{-\Delta[\text{DPBF}]}{t} = \frac{I_0 - I_t}{I_0} = I_{\text{in}} \Phi_{\text{ab}} \Phi_{\Delta} \Phi_r \quad (\text{S1})$$

$$\frac{k}{k^s} = \frac{\Phi_{\text{ab}}}{\Phi_{\text{ab}}^s} = \frac{\Phi_{\Delta}}{\Phi_{\Delta}^s} \quad (\text{S1})$$
